# Supplementary material for: Flux Increase Occurring When an Ultrafiltration Membrane Is Flipped from a Normal to an Inverted Position—Experiments and Theory
Source: MDPI journal article supplement (doi:10.3390/membranes12020129), 2022-01-21
Supplement: s1 [file s1]

# Flux Increase that Occurs when Ultrafiltration Membrane is Flipped from Normal to Inverted Position - Experiments and Theory

Ladan Zoka <sup>1</sup>, Ying Siew Khoo <sup>2</sup>, Woei Jye Lau <sup>2,\*</sup>, Takeshi Matsuura <sup>3,\*</sup>, Roberto Narbaitz <sup>1</sup>, Ahmad Fauzi Ismail <sup>2</sup>

<sup>1</sup> Department of Civil Engineering, University of Ottawa, 161 Louis Pasteur, Ottawa, ON, K1N 6N5, Canada

<sup>2</sup> Advanced Membrane Technology Research Centre (AMTEC), Universiti Teknologi Malaysia, 81310, Johor Bahru, Johor, Malaysia

<sup>3</sup> Department of Chemical and Biological Engineering, University of Ottawa, 161 Louis Pasteur, Ottawa, ON, K1N 6N5, Canada

\* Correspondence: lwoeijye@utm.my (W.J. Lau); matsuura@uottawa.ca (T. Matsuura)

The derivation of Equation (17) in the main text is as follows.

Case 1: The top pore is large and the bottom pore is small. Subscript  $t$  and  $b$  in Equation (16) of the main text are replaced with  $l$  and  $s$ , respectively, and  $J$  is called  $J_{l/s}$ . Then,

$$J_{l/s} = \frac{\Delta p - \frac{k\rho v_l^2}{4} - \frac{\rho\alpha^2}{2}v_l^2\left(\frac{r_l}{r_s}\right)^4}{\frac{8\eta\delta_s}{\pi\rho r_l^4}\left\{\left(\frac{\delta_l}{\delta_s}\right) + \left(\frac{r_l}{r_s}\right)^4\right\}} = \frac{\Delta p - \frac{\rho v_l^2}{4}\left\{k + 2\alpha^2\left(\frac{r_l}{r_s}\right)^4\right\}}{\frac{8\eta\delta_s}{\pi\rho r_l^4}\left\{\left(\frac{\delta_l}{\delta_s}\right) + \left(\frac{r_l}{r_s}\right)^4\right\}} \quad (S1)$$

Since

$$v_l = \frac{J_{l/s}}{\pi\rho r_l^2} \quad (S2)$$

$$J_{l/s} = \frac{\Delta p - \frac{\rho}{4}\left(\frac{J_{l/s}}{\pi\rho r_l^2}\right)^2\left\{k + 2\alpha^2\left(\frac{r_l}{r_b}\right)^4\right\}}{\frac{8\eta\delta_s}{\pi\rho r_l^4}\left\{\left(\frac{\delta_l}{\delta_s}\right) + \left(\frac{r_l}{r_s}\right)^4\right\}} \quad (S3)$$

Both denominator and numerator is multiplied by  $r_l^4$ , then

$$J_{l/s} = \frac{\Delta p r_l^4 - \frac{\rho}{4}\left(\frac{J_{l/s}}{\pi\rho}\right)^2\left\{k + 2\alpha^2\left(\frac{r_l}{r_b}\right)^4\right\}}{\frac{8\eta\delta_s}{\pi\rho}\left\{\left(\frac{\delta_l}{\delta_s}\right) + \left(\frac{r_l}{r_s}\right)^4\right\}} \quad (S4)$$

Now setting

$$P = \frac{\rho}{(\pi\rho)^2} \quad (S5)$$

$$Q = \frac{8\eta\delta_s}{\pi\rho} \quad (S6)$$

$$R = \left(\frac{r_l}{r_s}\right)^4 \quad (S7)$$

$$S = \frac{\delta_l}{\delta_s} \quad (S8)$$

$$T1 = k + 2\alpha^2 \left(\frac{r_l}{r_b}\right)^4 \quad (S9)$$

$$J_{l/s} = \frac{\Delta pr_l^4 - \frac{PT1}{4}(J_{l/s})^2}{Q(S+R)} \quad (S10)$$

Hence,

$$\frac{PT1}{4}(J_{l/s})^2 + Q(S+R)J_{l/s} - \Delta pr_l^4 = 0 \quad (S11)$$

Solving the quadratic equation for  $J_{l/s}$ ,

$$J_{l/s} = \frac{-Q(S+R) + \sqrt{Q^2(S+R)^2 + PT1\Delta pr_l^4}}{\frac{PT1}{2}} \quad (S12)$$

Case 2: The membrane is flipped. Now the top pore is small and the bottom pore is large.

From Equation (16) of the main text

$$J_{s/l} = \frac{\Delta p - \frac{k\rho v_s^2}{4} - \frac{\rho\alpha^2}{2}v_s^2\left(\frac{r_s}{r_l}\right)^4}{\frac{8\eta\delta_l}{\pi\rho r_s^4}\left(\left(\frac{\delta_s}{\delta_l}\right) + \left(\frac{r_s}{r_l}\right)^4\right)} = \frac{\Delta p - \frac{\rho v_l^2}{4}\left\{k\left(\frac{r_l}{r_s}\right)^4 + 2\alpha^2\right\}}{\frac{8\eta\delta_l}{\pi\rho r_s^4}\left(\left(\frac{\delta_s}{\delta_l}\right) + \left(\frac{r_s}{r_l}\right)^4\right)} \quad (S13)$$

$$J_{s/l} = \frac{\Delta p - \frac{\rho v_l^2}{4}\left\{k\left(\frac{r_l}{r_s}\right)^4 + 2\alpha^2\right\}}{\frac{8\eta\delta_l}{\pi\rho r_s^4}\left(\left(\frac{\delta_s}{\delta_l}\right) + \left(\frac{r_s}{r_l}\right)^4\right)} = \frac{\Delta p - \frac{\rho}{4}\left(\frac{J_{s/l}}{\pi\rho r_l^2}\right)^2\left\{k\left(\frac{r_l}{r_s}\right)^4 + 2\alpha^2\right\}}{\frac{8\eta\delta_l}{\pi\rho r_s^4}\left(\left(\frac{\delta_s}{\delta_l}\right) + \left(\frac{r_s}{r_l}\right)^4\right)} \quad (S14)$$

Multiplying both denominator and numerator with  $r_l^4$ ,

$$J_{s/l} = \frac{\Delta p r_l^4 - \frac{\rho}{4} \left( \frac{J_{s/l}}{\pi \rho} \right)^2 \left\{ k \left( \frac{r_l}{r_s} \right)^4 + 2\alpha^2 \right\}}{\frac{8\eta \delta_l r_l^4}{\pi \rho r_s^4} \left\{ \frac{\delta_s}{\delta_l} + \left( \frac{r_s}{r_l} \right)^4 \right\}} = \frac{\Delta p r_l^4 - \frac{\rho}{4} \left( \frac{J_{s/l}}{\pi \rho} \right)^2 \left\{ k \left( \frac{r_l}{r_s} \right)^4 + 2\alpha^2 \right\}}{\frac{8\eta \delta_s}{\pi \rho} \left\{ \left( \frac{\delta_l}{\delta_s} \right) + \left( \frac{r_l}{r_s} \right)^4 \right\}} \quad (S15)$$

Using Equations (S5) to (S8)

and setting

$$T2 = k \left( \frac{r_l}{r_s} \right)^4 + 2\alpha^2 \quad (S16)$$

$$J_{s/l} = \frac{\Delta p r_l^4 - \frac{PT2}{4} (J_{s/l})^2}{Q(S+R)} \quad (S17)$$

Rearranging,

$$\frac{PT2}{4} (J_{s/l})^2 + Q(S+R)J_{s/l} - \Delta p r_l^4 = 0 \quad (S18)$$

Solving the quadratic equation,

$$J_{s/l} = \frac{-Q(S+R) + \sqrt{Q^2(S+R)^2 + PT2\Delta p r_l^4}}{PT2/2} \quad (S19)$$

From Equations (S12) and (S19),

$$\frac{J_{l/s}}{J_{s/l}} = \frac{\left( \frac{-Q(S+R) + \sqrt{Q^2(S+R)^2 + PT1\Delta p r_l^4}}{PT1/2} \right)}{\left( \frac{-Q(S+R) + \sqrt{Q^2(S+R)^2 + PT2\Delta p r_l^4}}{PT2/2} \right)} = \frac{T2}{T1} \times \frac{-Q(S+R) + \sqrt{Q^2(S+R)^2 + PT1\Delta p r_l^4}}{-Q(S+R) + \sqrt{Q^2(S+R)^2 + PT2\Delta p r_l^4}} \quad (S20)$$

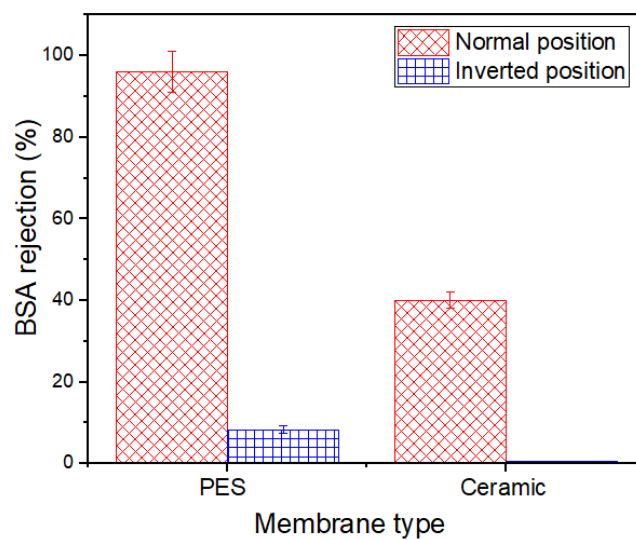

**Figure S1.** Comparison between the BSA rejection of PES and ceramic membrane in normal and inverted position.

**Table S1.** BSA concentration in feed and permeate samples produced from PES and ceramic membrane in normal and inverted position.

| Membrane | Position | BSA Feed (ppm) | BSA Permeate (ppm) |
|----------|----------|----------------|--------------------|
| PES      | Normal   | 100            | 4.0                |
|          | Inverted | 100            | 91.7               |
| Ceramic  | Normal   | 500            | 300                |
|          | Inverted | 500            | 490                |
